# Supplementary material
Source: bioRxiv or medRxiv preprint supplement (https://www.biorxiv.org/highwire/filestream/26969/field_highwire_adjunct_files/8/095349-6.pdf)
Supplement: Supplementary file [file 095349-6.pdf]

| Top promoter[SNPs in top promoter]                        | Linkage                                                                                                                                                                                          | Corrected coexpression score | FDR  |
|-----------------------------------------------------------|--------------------------------------------------------------------------------------------------------------------------------------------------------------------------------------------------|------------------------------|------|
| p94@APOB [rs1801701]                                      |                                                                                                                                                                                                  | 0.77                         | 0.0  |
| p@chr17:64210704..64210723,+ [rs1801689]                  |                                                                                                                                                                                                  | 0.73                         | 0.0  |
| p3@ABCG5 [rs11887534]                                     |                                                                                                                                                                                                  | 0.66                         | 0.0  |
|                                                           | rs11887534:rs13395550 D'=0.25; r <sup>2</sup> =0.06.<br>enhancer@chr2:44007303-44007575 [rs13395550]                                                                                             | 0.06                         | 0.87 |
| p2@ENST00000518619 [rs9987289, rs4841132]                 |                                                                                                                                                                                                  | 0.64                         | 0.0  |
|                                                           | rs9987289:rs7357361 D'=1.0; r <sup>2</sup> =0.57.<br>enhancer@chr8:9219931-9220273<br>[rs7357361];rs4841132:rs7357361 D'=1.0; r <sup>2</sup> =0.57.<br>enhancer@chr8:9219931-9220273 [rs7357361] | 0.21                         | 0.46 |
| p2@ASCC2 [rs4823054]                                      |                                                                                                                                                                                                  | 0.57                         | 0.0  |
| p1@APOA5 [rs651821]                                       |                                                                                                                                                                                                  | 0.55                         | 0.0  |
| p6@HNF1A-AS1 [rs1169286]                                  |                                                                                                                                                                                                  | 0.54                         | 0.0  |
|                                                           | rs1169286:rs2258287 D'=0.68; r <sup>2</sup> =0.39. p1@C12orf43<br>[rs2258287]                                                                                                                    | 0.18                         | 0.55 |
| p@chr19:19616795..19616800,+ [rs1063966]                  |                                                                                                                                                                                                  | 0.53                         | 0.0  |
|                                                           | rs1063966:rs4808967 D'=1.0; r <sup>2</sup> =1.0.<br>p@chr19:19640454..19640461,+ [rs4808967]                                                                                                     | 0.24                         | 0.36 |
| p2@LPIN3 [rs6029636]                                      |                                                                                                                                                                                                  | 0.53                         | 0.0  |
| p@chr16:72075048..72075055,- [rs9932951]                  |                                                                                                                                                                                                  | 0.52                         | 0.0  |
|                                                           | rs9932951:rs3213422 D'=0.29; r <sup>2</sup> =0.08. p1@DHODH<br>[rs34270657, rs3213422]                                                                                                           | 0.43                         | 0.03 |
| p2@NPC1L1 [rs41279633, rs17655652]                        |                                                                                                                                                                                                  | 0.51                         | 0.0  |
|                                                           | rs17655652:rs732797 D'=0.92; r <sup>2</sup> =0.4.<br>p@chr7:44646674..44646689,+ [rs732797]                                                                                                      | 0.17                         | 0.57 |
| p@chr1:109727753..109727759,+ [rs12239854]                |                                                                                                                                                                                                  | 0.49                         | 0.0  |
| p1@SPC24 [rs892114, rs7251031]                            |                                                                                                                                                                                                  | 0.47                         | 0.01 |
| p1@FRK [rs1999929]                                        |                                                                                                                                                                                                  | 0.45                         | 0.02 |
| p3@SLC22A1 [rs12208357]                                   |                                                                                                                                                                                                  | 0.43                         | 0.04 |
| p4@HMGCR [rs3761740]                                      |                                                                                                                                                                                                  | 0.42                         | 0.05 |
| p12@TRIB1 [rs17405319]                                    |                                                                                                                                                                                                  | 0.42                         | 0.05 |
| p1@FEN1 [rs174538, rs412334]                              |                                                                                                                                                                                                  | 0.41                         | 0.05 |
|                                                           | rs174538:rs412334 D'=1.0; r <sup>2</sup> =0.07. p4@C11orf10<br>[rs412334];same SNP, different promoter: p4@C11orf10<br>[rs412334]                                                                | 0.12                         | 0.72 |
| p5@ABCA1 [rs1800978]                                      |                                                                                                                                                                                                  | 0.39                         | 0.07 |
| p3@TIRAP [rs10893493]                                     |                                                                                                                                                                                                  | 0.37                         | 0.1  |
|                                                           | rs10893493:rs638433 D'=0.96; r <sup>2</sup> =0.92.<br>enhancer@chr11:126180283-126180636 [rs638433]                                                                                              | 0.19                         | 0.53 |
| p@chr1:63112277..63112278,+ [rs1168085]                   |                                                                                                                                                                                                  | 0.37                         | 0.1  |
| p@chr2:121310959..121310964,- [rs940688]                  |                                                                                                                                                                                                  | 0.36                         | 0.11 |
| p7@PCSK9 [rs11591147, rs11583680]                         |                                                                                                                                                                                                  | 0.35                         | 0.12 |
| p3@HAVCR1 [rs67960962]                                    |                                                                                                                                                                                                  | 0.35                         | 0.12 |
|                                                           | rs67960962:rs6882076 D'=0.83; r <sup>2</sup> =0.31. p1@TIMD4<br>[rs6882076]                                                                                                                      | 0.07                         | 0.87 |
| p@chr9:136154265..136154271,- [rs579459, rs649129]        |                                                                                                                                                                                                  | 0.34                         | 0.14 |
| chr19:19488822..19488846,+ [rs12973258]                   |                                                                                                                                                                                                  | 0.33                         | 0.16 |
| chr6:160770176..160770186,- [rs539298]                    |                                                                                                                                                                                                  | 0.33                         | 0.16 |
| p4@TAP2 [rs241448, rs241447, rs241452]                    |                                                                                                                                                                                                  | 0.33                         | 0.17 |
| p@chr19:45411878..45411884,- [rs7412]                     |                                                                                                                                                                                                  | 0.31                         | 0.2  |
| p3@C6orf10 [rs6913309]                                    |                                                                                                                                                                                                  | 0.31                         | 0.21 |
|                                                           | rs6913309:rs13218331 D'=0.87; r <sup>2</sup> =0.44.<br>p@chr6:32411190..32411212,- [rs13218331]                                                                                                  | 0.26                         | 0.31 |
| p@chr8:145010972..145010996,- [rs6993938]                 |                                                                                                                                                                                                  | 0.3                          | 0.21 |
| p@chr19:45242420..45242462,+ [rs1531517]                  |                                                                                                                                                                                                  | 0.3                          | 0.21 |
|                                                           | rs1531517:rs10422182 D'=0.62; r <sup>2</sup> =0.22.<br>p@chr19:45159154..45159158,+ [rs10422182]                                                                                                 | 0.09                         | 0.82 |
| chr19:11031515..11031547,+ [rs2288842]                    |                                                                                                                                                                                                  | 0.29                         | 0.23 |
|                                                           | rs2288842:rs11085749 D'=1.0; r <sup>2</sup> =0.61.<br>p@chr19:10961151..10961183,+ [rs11085749]                                                                                                  | 0.17                         | 0.57 |
| p4@SH2B3 [rs739496]                                       |                                                                                                                                                                                                  | 0.29                         | 0.23 |
| p@chr2:136594382..136594389,+ [rs2236783]                 |                                                                                                                                                                                                  | 0.29                         | 0.23 |
| p1@NAT2 [rs4646246]                                       |                                                                                                                                                                                                  | 0.29                         | 0.24 |
| enhancer@chr20:34127589-34128004 [rs2104417]              |                                                                                                                                                                                                  | 0.27                         | 0.31 |
| p5@RBM12 [rs6121015]                                      |                                                                                                                                                                                                  | 0.26                         | 0.31 |
| p31@CORO1C [rs3741782]                                    |                                                                                                                                                                                                  | 0.26                         | 0.31 |
| p23@USP1 [rs646179]                                       |                                                                                                                                                                                                  | 0.25                         | 0.36 |
| p4@GSTM4 [rs1010167]                                      |                                                                                                                                                                                                  | 0.23                         | 0.42 |
| p16@HLX [rs17597773]                                      |                                                                                                                                                                                                  | 0.23                         | 0.42 |
| p@chr6:32658073..32658091,- [rs9469220]                   |                                                                                                                                                                                                  | 0.22                         | 0.44 |
| p12@PLCG1 [rs6124323]                                     |                                                                                                                                                                                                  | 0.21                         | 0.48 |
| p@chr1:25756820..25756837,+ [rs9438904]                   |                                                                                                                                                                                                  | 0.2                          | 0.49 |
| p@chr6:31239406..31239455,+ [rs9264664]                   |                                                                                                                                                                                                  | 0.2                          | 0.51 |
| p1@POC5 [rs2291630]                                       |                                                                                                                                                                                                  | 0.19                         | 0.53 |
|                                                           | rs2291630:rs2047059 D'=1.0; r <sup>2</sup> =0.64. p2@POC5<br>[rs2047059]                                                                                                                         | 0.14                         | 0.69 |
|                                                           | rs2291630:rs7715806 D'=0.95; r <sup>2</sup> =0.39.<br>enhancer@chr5:75034241-75034569 [rs7715806]                                                                                                | 0.1                          | 0.76 |
|                                                           | rs2291630:rs34358 D'=1.0; r <sup>2</sup> =0.47.<br>p@chr5:74965139..74965165,+ [rs34358]                                                                                                         | 0.08                         | 0.82 |
| p1@SLC44A4 [rs605203]                                     |                                                                                                                                                                                                  | 0.19                         | 0.53 |
| chr20:39634184..39634189,- [rs1000410]                    |                                                                                                                                                                                                  | 0.17                         | 0.57 |
| enhancer@chr16:56985400-56985562 [rs72786786, rs12448528] |                                                                                                                                                                                                  | 0.17                         | 0.57 |
| p@chr1:63266602..63266609,- [rs11208033]                  |                                                                                                                                                                                                  | 0.17                         | 0.57 |
| chr19:10742301..10742328,+ [rs2288904, rs1560711]         |                                                                                                                                                                                                  | 0.15                         | 0.63 |
| p@chr12:112212004..112212016,+ [rs2238151]                |                                                                                                                                                                                                  | 0.15                         | 0.64 |
| p@chr2:216286925..216286942,- [rs1250248]                 |                                                                                                                                                                                                  | 0.13                         | 0.7  |
| enhancer@chr14:94813306-94813452 [rs926144]               |                                                                                                                                                                                                  | 0.13                         | 0.7  |
| p4@FUT1 [rs838136]                                        |                                                                                                                                                                                                  | 0.13                         | 0.7  |
| p3@SPTY2D1 [rs7943121]                                    |                                                                                                                                                                                                  | 0.12                         | 0.7  |
| enhancer@chr5:74805918-74806308 [rs5744533]               |                                                                                                                                                                                                  | 0.11                         | 0.76 |
| p@chr10:113928643..113928689,- [rs2803616]                |                                                                                                                                                                                                  | 0.11                         | 0.76 |
| p1@ENST00000364447 [rs1003116]                            |                                                                                                                                                                                                  | 0.1                          | 0.78 |
| enhancer@chr19:46018095-46018753 [rs7255743]              |                                                                                                                                                                                                  | 0.08                         | 0.82 |
| enhancer@chr2:136816831-136817220 [rs749873]              |                                                                                                                                                                                                  | 0.08                         | 0.85 |
| p@chr3:12704990..12705013,- [rs904453]                    |                                                                                                                                                                                                  | 0.07                         | 0.85 |

|                                                      |      |      |
|------------------------------------------------------|------|------|
| p@chr11:117075245..117075293,- [rs508487]            | 0.06 | 0.87 |
| enhancer@chr1:109754796-109754995 [rs187413240]      | 0.06 | 0.87 |
| enhancer@chr11:61713558-61713889 [rs1534842]         | 0.06 | 0.87 |
| p@chr6:16131425..16131449,+ [rs2235215, rs2066905]   | 0.06 | 0.87 |
| enhancer@chr8:59311673-59312115 [rs1030431]          | 0.05 | 0.88 |
| p@chr2:135893438..135893485,+ [rs10445686]           | 0.04 | 0.92 |
| enhancer@chr6:34663389-34663600 [rs3800457]          | 0.04 | 0.92 |
| enhancer@chr1:92668364-92668570 [rs3131816]          | 0.03 | 0.92 |
| p3@C17orf57 [rs2271803]                              | 0.03 | 0.92 |
| p@chr5:74964235..74964256,+ [rs7715739, rs369034591] | 0.02 | 0.96 |
| p1@ATXN2 [rs695871]                                  | 0.02 | 0.96 |
| p@chr6:32078154..32078167,- [rs3807039]              | 0.02 | 0.96 |
| enhancer@chr1:25802039-25802147 [rs66844552]         | 0.01 | 0.96 |
| p@chr6:31512638..31512648,- [rs2071593]              | 0.0  | 1.0  |
